# Supplementary material
Source: PubMed Central journal article supplement (PMC9112925)
Supplement: aac.00189-22-s0001.pdf [file aac.00189-22-s0001.pdf]

***In Vitro* Activity of Ceftolozane/Tazobactam, Imipenem/Relebactam, Ceftazidime/Avibactam and Comparators against *Pseudomonas aeruginosa* Isolates Collected in United States Hospitals – Results from the SMART Surveillance Program, 2018-2020**

James A. Karlowsky, Sibylle H. Lob, C. Andrew DeRyke, David W. Hilbert, Michael T. Wong, Katherine Young, Fakhar Siddiqui, Mary R. Motyl and Daniel F. Sahn

**SUPPLEMENTARY DATA**

**TABLE S1** Percentages of susceptibility to ceftolozane/tazobactam, imipenem/relebactam, and ceftazidime/avibactam among all *P. aeruginosa* isolates and subsets of nonsusceptible and resistant isolates collected in four United States census regions

| Phenotype       | West <sup>a</sup> |           |           |           | Midwest <sup>b</sup> |           |           |           | Northeast <sup>c</sup> |           |           |           | South <sup>d</sup> |           |           |           |
|-----------------|-------------------|-----------|-----------|-----------|----------------------|-----------|-----------|-----------|------------------------|-----------|-----------|-----------|--------------------|-----------|-----------|-----------|
|                 | N                 | C/T<br>%S | IMR<br>%S | CZA<br>%S | N                    | C/T<br>%S | IMR<br>%S | CZA<br>%S | N                      | C/T<br>%S | IMR<br>%S | CZA<br>%S | N                  | C/T<br>%S | IMR<br>%S | CZA<br>%S |
| All             | 596               | 95.5      | 89.6      | 92.1      | 1109                 | 96.4      | 93.1      | 95.9      | 381                    | 96.1      | 87.4      | 92.1      | 445                | 98.2      | 93.9      | 96.0      |
| MDR             | 80                | 71.3      | 46.3      | 48.8      | 124                  | 73.4      | 62.9      | 71.0      | 68                     | 80.9      | 58.8      | 66.2      | 47                 | 83.0      | 70.2      | 63.8      |
| Pan-β-lactam-NS | 63                | 69.8      | 42.9      | 41.3      | 73                   | 71.2      | 56.2      | 58.9      | 47                     | 76.6      | 48.9      | 51.1      | 24                 | 83.3      | 62.5      | 45.8      |
| DTR             | 54                | 66.7      | 40.7      | 37.0      | 62                   | 67.7      | 51.6      | 58.1      | 33                     | 72.7      | 36.4      | 39.4      | 20                 | 80.0      | 60.0      | 35.0      |

Abbreviations: C/T, ceftolozane/tazobactam; IMR, imipenem/relebactam; CZA, ceftazidime/avibactam; S, susceptible; CAZ, ceftazidime; TZP, piperacillin/tazobactam; IMI, imipenem; MEM, meropenem; NS, non-susceptible; MDR, multidrug-resistant; pan-β-lactam-NS, non-susceptible to all tested β-lactams; DTR, difficult-to-treat-resistance.

<sup>a</sup> West: California, Colorado, Utah, Washington.

<sup>b</sup> Midwest: Illinois, Indiana, Michigan, Minnesota, Nebraska, Ohio, Wisconsin.

<sup>c</sup> Northeast: New York.

<sup>d</sup> South: Florida, Georgia, North Carolina, Texas.

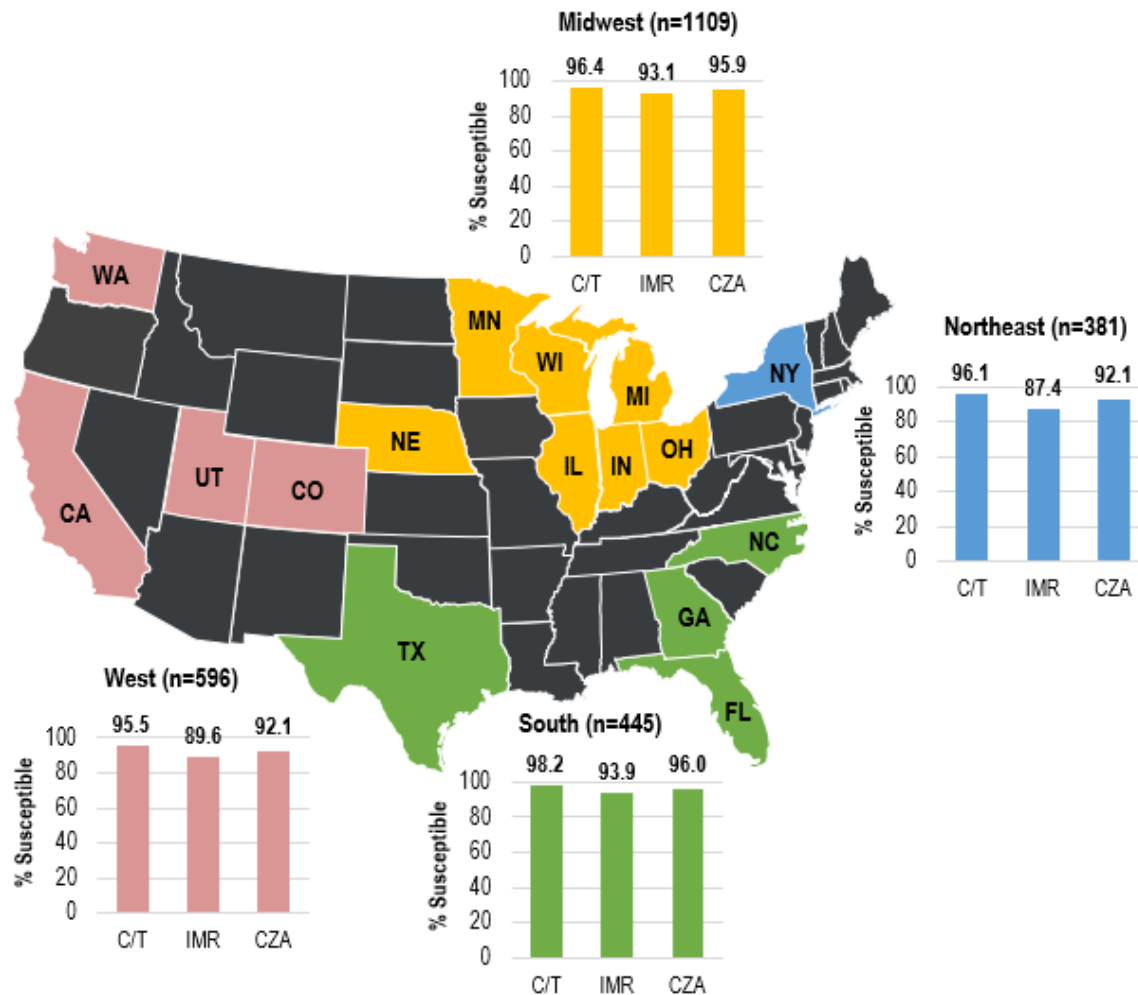

**FIG S1** *In vitro* susceptibility to ceftolozane/tazobactam, imipenem/relebactam and ceftazidime/avibactam among 2531 *P. aeruginosa* isolates collected in four United States census regions.

Abbreviations: C/T, ceftolozane/tazobactam; CZA, ceftazidime/avibactam; IMI/REL, imipenem/relebactam; CA, California; CO, Colorado; FL, Florida; GA, Georgia; IL, Illinois; IM, Indiana; MI, Michigan; MN, Minnesota; NE, Nebraska; NY, New York; NC, North Carolina; OH, Ohio; TX, Texas; UT, Utah; WA, Washington; WI, Wisconsin.

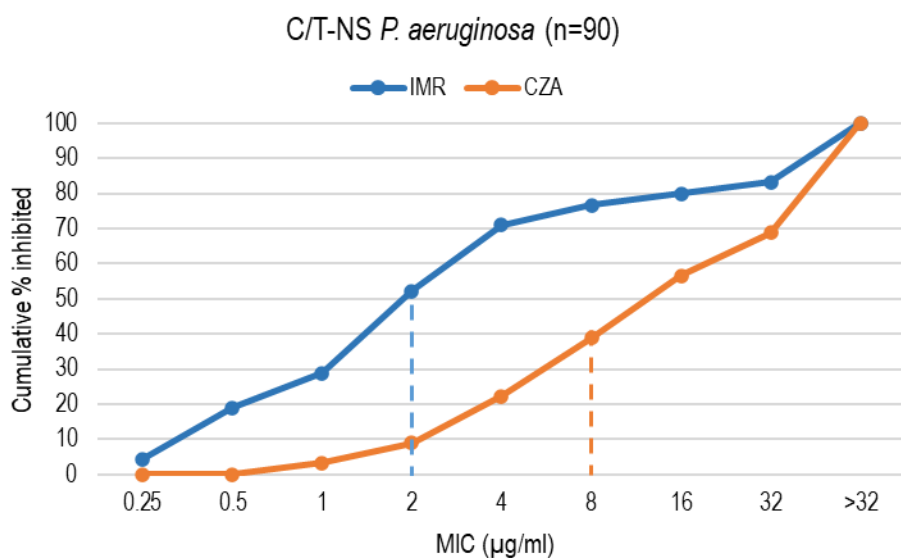

**FIG S2** Cumulative MICs for imipenem/relebactam and ceftazidime/avibactam against ceftolozane/tazobactam-nonsusceptible *P. aeruginosa* isolates.

Abbreviations: C/T, ceftolozane/tazobactam; IMR, imipenem/relebactam CZA, ceftazidime/avibactam; NS, nonsusceptible.

CLSI susceptibility breakpoints indicated by dashed lines.
